# Supplementary material for: Modelling the three-dimensional structure of the right-terminal domain of pospiviroids
Source: PubMed Central journal article supplement (PMC5429643; doi:10.1038/s41598-017-00764-x), 2017-04-06
Supplement: 41598_2017_764_MOESM1_ESM.pdf [file 41598_2017_764_MOESM1_ESM.pdf]

# Supplementary information for

## “Modeling the three-dimensional structure of the right-terminal domain of pospiviroids”

Gerhard Steger<sup>1</sup>

<sup>1</sup> Institut für Physikalische Biologie, Heinrich-Heine-University Düsseldorf, 40225 Düsseldorf, Germany

\* Email: [steger@biophys.uni-duesseldorf.de](mailto:steger@biophys.uni-duesseldorf.de)

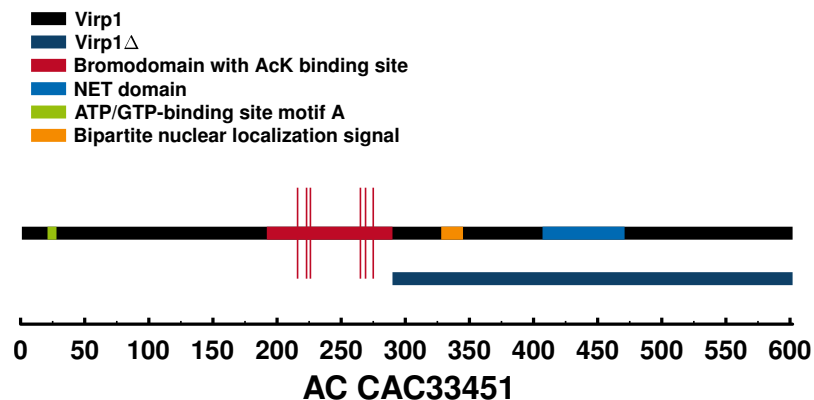

**Figure S1.** Structure of Virp1. Plant BET (bromodomain(s) and extraterminal domain) proteins typically have only one bromodomain (marked in red; amino acids 192–290; Prosite entry PS50014), whereas they have mostly two bromodomains in animals; six amino acids (marked by red lines; aa 216, 223, 226, 265, 269, and 275) are responsible for the acetyl-lysine recognition of histones and other proteins.<sup>1</sup> The structure of the extraterminal domain (lightblue; aa 407–471; PS51525) has an acidic patch that may interact with other proteins or nucleic acids.<sup>2</sup> Furthermore, SCANPROSITE<sup>3</sup> predicts an ATP/GTP-binding site (green; aa 21–28; PS00017) and a bipartite nuclear localization signal (orange; aa 328–344; PS50079). Virp1  $\Delta$  (aa 290–602) is sufficient for binding to PSTVd<sup>4</sup>.



**Table S1.** Leontis & Westhof nomenclature<sup>5</sup>

|              |                           |     |  |
|--------------|---------------------------|-----|--|
| <i>cis</i>   | Watson-Crick/Watson-Crick | cWW |  |
| <i>trans</i> | Watson-Crick/Watson-Crick | tWW |  |
| <i>cis</i>   | Watson-Crick/Hoogsteen    | cWH |  |
| <i>trans</i> | Watson-Crick/Hoogsteen    | tWH |  |
| <i>cis</i>   | Hoogsteen/Watson-Crick    | cHW |  |
| <i>trans</i> | Hoogsteen/Watson-Crick    | tHW |  |
| <i>cis</i>   | Watson-Crick/sugar        | cWS |  |
| <i>trans</i> | Watson-Crick/sugar        | tWS |  |
| <i>cis</i>   | sugar/Watson-Crick        | cSW |  |
| <i>trans</i> | sugar/Watson-Crick        | tSW |  |
| <i>cis</i>   | Hoogsteen/Hoogsteen       | cHH |  |
| <i>trans</i> | Hoogsteen/Hoogsteen       | tHH |  |
| <i>cis</i>   | Hoogsteen/sugar           | cHS |  |
| <i>trans</i> | Hoogsteen/sugar           | tHS |  |
| <i>cis</i>   | sugar/Hoogsteen           | cSH |  |
| <i>trans</i> | sugar/Hoogsteen           | tSH |  |
| <i>cis</i>   | sugar/sugar               | cSs |  |
| <i>trans</i> | sugar/sugar               | tSs |  |
| <i>cis</i>   | sugar/sugar               | csS |  |
| <i>trans</i> | sugar/sugar               | tsS |  |
|              |                           | GC  |  |
|              |                           | AU  |  |
| stacking     |                           |     |  |

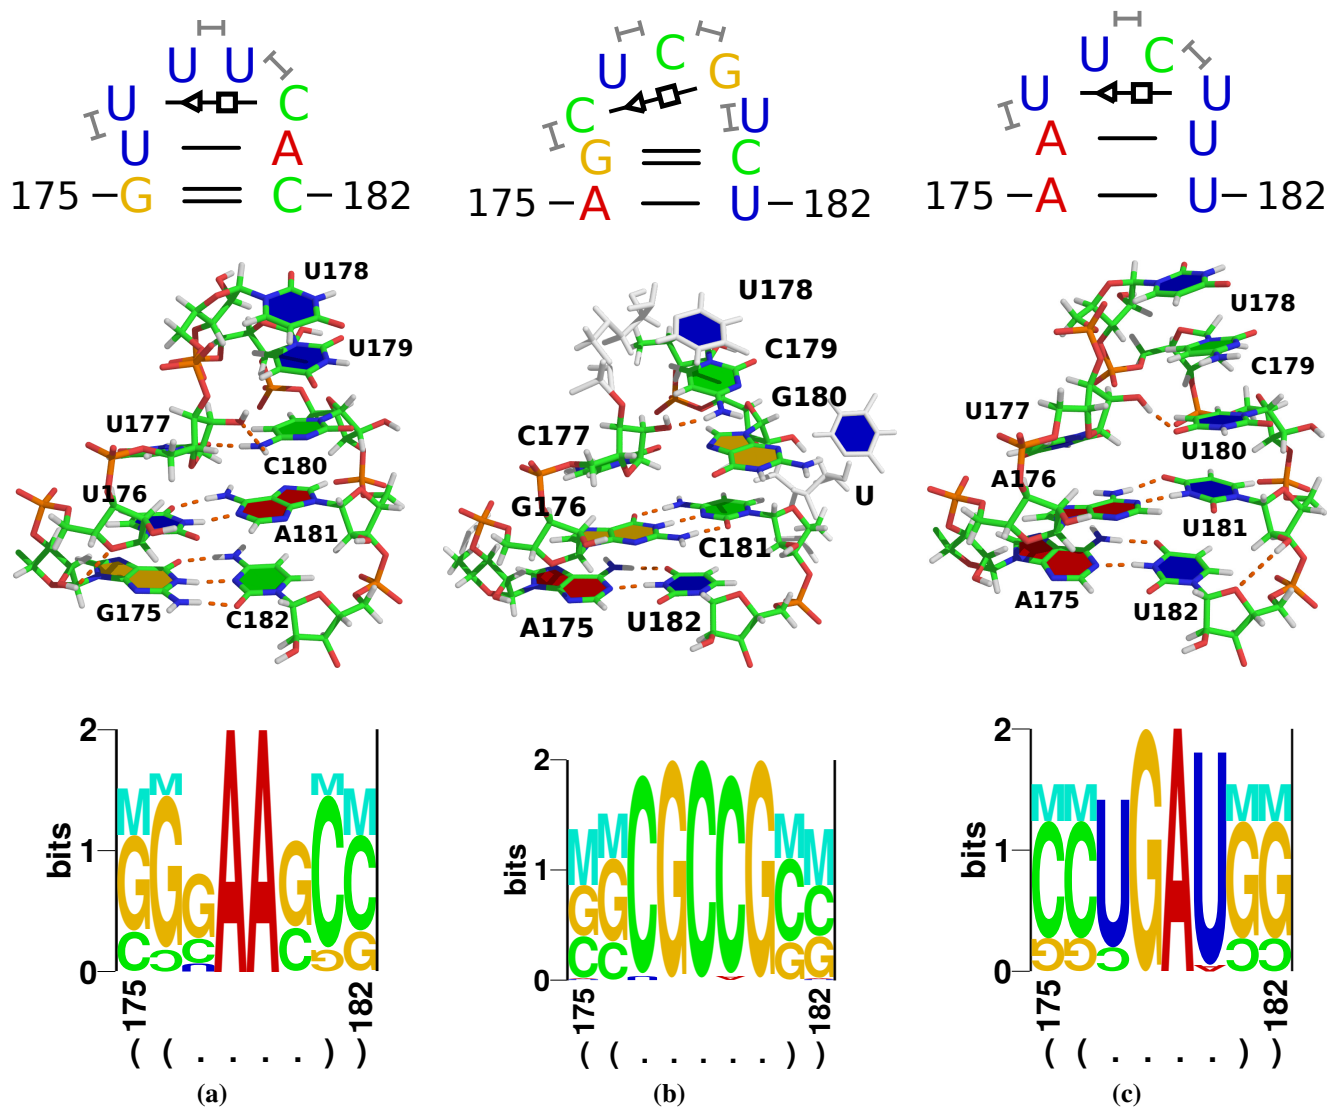

**Figure S3.** Results of ROSETTA modeling of HP loop. Results for a typical loop of most pospiroviroids is shown in (a); a loop typical for CEVd, IrVd, and CBCVd is shown in (b); an exceptional loop of TCDVd is shown in (c). The numbering of the CEVd loop in (b) is arbitrary due to the additional loop nucleotide; the numbering of the closing pair, however, fits to the consensus structure (Fig. 1c). Top: Interactions identified by x3DNA-DSSR. Middle: 3D view produced by PYMOL. Bottom: Logos produced by RNA REDESIGN.

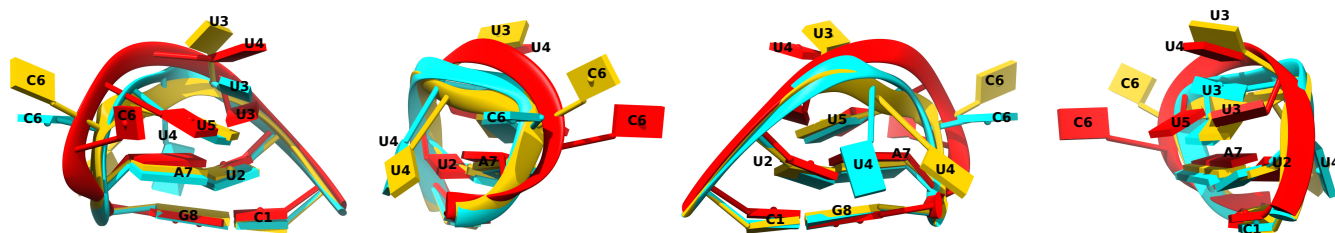

**Figure S4.** Histone mRNA stem-loop. The overlay on the left is identical to Fig. 7a; each further overlay is turned by 90° along the vertical axis.

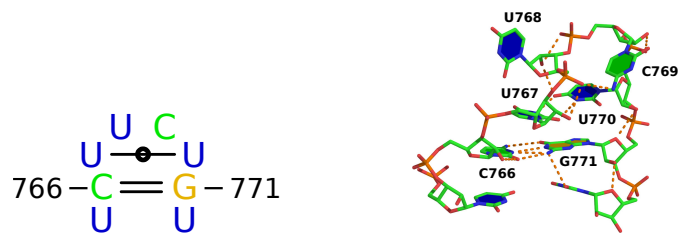

**Figure S5.** Structure of a hairpin loop from the *Triticum aestivum* 80S ribosome. The model (PDB entry 4V7E<sup>6</sup>) is based on cryo-electron microscopy with a resolution of < 5 Å. The hairpin loop is identical in sequence to TCDVd (GenBank ID GQ169709), but the closing pair is C:G instead of an A:U in the TCDVd.

**Table S2.** Structures and infectivity of HP variants.<sup>7</sup>

| Mutant <sup>a</sup>       | R+ | 1 | 2 | 3 |
|---------------------------|----|---|---|---|
| Structure(s) <sup>b</sup> |    |   |   |   |
| Root <sup>c</sup>         | 0  | 2 | 2 | 1 |
| Root <sup>d</sup>         | 0  | 3 | 1 | 1 |
| Leaves <sup>d</sup>       | 0  | 6 | 0 | 0 |

<sup>a</sup>The synthetic variant R+ differs from PSTVd intermediate (WT; AC M88678) by an insertion +G<sub>176</sub> and two replacements U<sub>177</sub>U<sub>178</sub> → AA; variants 1–3 are the progeny from *Agrobacterium tumefaciens*-mediated infections of tomato plants with a corresponding plasmid containing a R+ cDNA insertion in (+) orientation.

<sup>b</sup>On the left are given relevant structures and their  $\Delta G_{37^\circ\text{C}}$  values (in kcal/mol) as predicted by RNAFOLD,<sup>8</sup> mutations are marked in bold. On the right are given annotations by RNAVIEW of top HP models predicted by ROSETTA.

<sup>c</sup>In 90% of infected plants, viroid progeny was only detected in galls and roots, but not leaves. Numbers give sequence variants present in six cDNA clones from root.

<sup>d</sup>In 10% of infected plants, viroid progeny was detected in galls, roots, and leaves. Numbers give sequence variants present in six cDNA clones from root (upper row) and leaf (lower row), respectively.

**Table S3.** Predicted structure of IL2 mutants.<sup>9</sup>

| Mutant <sup>a</sup>                  | WT         | MT1            | MT2     | MT3            | MT4            | MT6            |
|--------------------------------------|------------|----------------|---------|----------------|----------------|----------------|
| Structure <sup>b</sup>               |            |                |         |                |                |                |
| Structure <sup>c</sup>               |            |                |         |                |                |                |
| Infectivity <sup>d</sup>             | infectious | non-infectious | reverts | non-infectious | non-infectious | non-infectious |
| Percentage of bound RNA <sup>e</sup> | 100        | 13             | 16      | 25             | 17             | 16             |

<sup>a</sup>Wild-type (WT) and mutant (MT1–4, MT6) names; the TR fragments (nt. 145–223) are named R79-wt, R79-mt1–4, and R79-mt6, respectively, in Gozmanova *et al.*<sup>9</sup>

<sup>b</sup>Nucleotides mutated in comparison to WT are in red; these structures were used as input for ROSETTA modelling.

<sup>c</sup>Annotation by RNAVIEW of top models predicted by ROSETTA.

<sup>d</sup>Longer-than-unit-length viroid (based on variant KF440-2, AC X58388) RNA transcripts were assayed for infectivity on tomato plants.<sup>9</sup>

<sup>e</sup>The binding of a Virp1 fragment to TR RNA fragments was determined by EMSA; the fraction of bound WT RNA was set to 100%.<sup>9</sup>

**Table S4.** Structures and ability to replicate and traffick of synthetic TR mutants.<sup>10</sup>

| Mutant <sup>a</sup>                   | 25 (IL1)                                                                                 | 26 (IL2)                                                                                     | 27 (HP)                                                      |
|---------------------------------------|------------------------------------------------------------------------------------------|----------------------------------------------------------------------------------------------|--------------------------------------------------------------|
| Structure of WT <sup>b</sup>          | <pre> 163       168   C G C C G A             G C U U C U 196       191           </pre> | <pre> 169       173   A A C A G             U U C U C 190       184           </pre>         | <pre> 175   G U U U             C A U C 182           </pre> |
| Structure of mutant <sup>c</sup>      | <pre> 163       168   C G A A G A             G C U U C U 196       191           </pre> | <pre> 169       173   A A G G A A G             U U C C U U C 190       184           </pre> | <pre> 175   G A A U             C A U C 182           </pre> |
| Replication efficiency/% <sup>d</sup> | 29                                                                                       | 46                                                                                           | 53                                                           |
| Trafficking <sup>e</sup>              | 0/12                                                                                     | 0/12                                                                                         | 1/12 <sup>f</sup>                                            |

<sup>a</sup>The loops in the secondary structure of PSTVd (see Fig. 1a) were numbered from left to right in Zhong *et al.*;<sup>10</sup> that is, loops 25, 26, and 27 correspond to IL1, IL2, and HP, respectively. The internal loops IL1 and IL2 were closed by canonical WC base pairs; in the HP loop a replacement U<sub>176</sub>U → AA was made.

<sup>b</sup>Annotation by RNAVIEW of top models predicted by ROSETTA for the WT sequence.

<sup>c</sup>Annotation by RNAVIEW of top models predicted by ROSETTA for the mutant sequences. The red letters denote introduced mutations from the WT.

<sup>d</sup>Accumulation level of circular genomic RNA in inoculated protoplasts of *Nicotiana benthamiana* cultured cells expressed as percentage of wild-type PSTVd.

<sup>e</sup>Number of plants showing systemic infection over total number of plants inoculated.

<sup>f</sup>In the one plant that got systemically infected an additional mutation (A<sub>181</sub> → U; see structure on the right) occurred that restored the loop-closing basepair.

## References

1. Sanchez, R. & Zhou, M. The role of human bromodomains in chromatin biology and gene transcription. *Curr. Opin. Drug Discov. Devel.* **12**, 659–665 (2009).
2. Lin, Y. *et al.* Solution structure of the extraterminal domain of the bromodomain-containing protein BRD4. *Protein Sci.* **17**, 2174–2179 (2008). <http://dx.doi.org/10.1110/ps.037580.108>.
3. de Castro, E. *et al.* ScanProsite: detection of PROSITE signature matches and ProRule-associated functional and structural residues in proteins. *Nucleic Acids Res.* **34**, W362–5 (2006). <http://dx.doi.org/10.1093/nar/gkl1124>.
4. Maniataki, E., Martínez de Alba, A., Sägerser, R., Tabler, M. & Tsagris, M. Viroid RNA systemic spread may depend on the interaction of a 71-nucleotide bulged hairpin with the host protein VirP1. *RNA* **9**, 346–354 (2003). <http://dx.doi.org/10.1261/rna.2162203>.
5. Leontis, N. & Westhof, E. Geometric nomenclature and classification of RNA base pairs. *RNA* **7**, 499–512 (2001).
6. Gogala, M. *et al.* Structures of the Sec61 complex engaged in nascent peptide translocation or membrane insertion. *Nature* **506**, 107–110 (2014). <http://dx.doi.org/10.1038/nature12950>.
7. Hammond, R. *Agrobacterium*-mediated inoculation of PSTVd cDNAs onto tomato reveals the biological effect of apparently lethal mutations. *Virology* **201**, 36–45 (1994). <http://dx.doi.org/10.1006/viro.1994.1263>.
8. Lorenz, R. *et al.* ViennaRNA Package 2.0. *Algorithms Mol. Biol.* **6**, 26 (2011). <http://dx.doi.org/10.1186/1748-7188-6-26>.
9. Gozmanova, M., Denti, M., Minkov, I., Tsagris, M. & Tabler, M. Characterization of the RNA motif responsible for the specific interaction of potato spindle tuber viroid RNA (PSTVd) and the tomato protein Virp1. *Nucleic Acids Res.* **31**, 5534–5543 (2003). <http://dx.doi.org/10.1093/nar/gkg777>.
10. Zhong, X., Archual, A., Amin, A. & Ding, B. A genomic map of viroid RNA motifs critical for replication and systemic trafficking. *Plant Cell* **20**, 35–47 (2008). <http://dx.doi.org/10.1105/tpc.107.056606>.
